# Supplementary material for: Ten years transmission of the new variant of Chlamydia trachomatis in Sweden: prevalence of infections and associated complications
Source: PubMed Central journal article supplement — Sex Transm Infect. 2017 Jul 19;94(2):100–4. doi: 10.1136/sextrans-2016-052992 (PMC5870454; doi:10.1136/sextrans-2016-052992), 2017-07-19
Supplement: sextrans-2016-052992supp003.pdf [file sextrans-2016-052992supp003.pdf]

## Abstract in Swedish to 10.1136/sextrans-2016-052992

### Ten years transmission of the new variant of *Chlamydia trachomatis* in Sweden: prevalence of infections and associated complications

#### Abstrakt

**Syfte** En ny variant av *Chlamydia trachomatis* (nvCT) upptäcktes i Sverige 2006. Den har en deletion i sin plasmid vilket resulterade i felaktiga analysresultat vid användning av dåvarande testsystem från Abbott och Roche. Det tredje testsystemet som användes då (Becton Dickinson [BD]) påvisar nvCT. Initialt utgjorde nvCT upp till 65% av alla klamydiafall i landsting som använde testsystem från Abbott/Roche.

**Metoder** *C. trachomatis*-positiva prover insamlade mellan 2007 och 2015 analyserades med en PCR som specifikt påvisar nvCT. Genotypning gjordes med multilocus-sekvenstypning (MLST) och sekvensering av ompA-genen. Data på antal fall av utomkvedshavandeskap och äggledarinflammation (pelvic inflammatory disease) togs från nationella register.

**Resultat** Totalt analyserades 5101 *C. trachomatis*-positiva prover. Andelen nvCT minskade signifikant i de två landsting som använde Roche-system, från 56% 2007 till 6,5% 2015 ( $p < 0,001$ ). I de två landsting som använde BD-systemet noterades en minskning från 19% 2007 till 5,2% 2015 ( $p < 0,001$ ). Femton nvCT-fall från 2015 och 102 fall från åren 2006 till 2009 visade identiska MLST-profiler. Landsting som använde Roche/Abbott-system visade högre medelvärden av antal fall med utomkvedshavandeskap och äggledarinflammation i jämförelse med landsting som använde BD-systemet.

**Slutsatser** Andelen nvCT har minskat i alla landsting och konvergerat till en låg prevalens oavsett tidigare värden. Genotypning visade att nvCT är av klonal natur och är genetiskt stabil. Bristfällig detektion hade endast marginell effekt på antalet komplikationsepisoder.

This abstract has been translated and adapted from the original English-language content. Translated content is provided on an "as is" basis. Translation accuracy or reliability is not guaranteed or implied. BMJ is not responsible for any errors and omissions arising from translation to the fullest extent permitted by law, BMJ shall not incur any liability, including without limitation, liability for damages, arising from the translated text.
